# Supplementary material for: 20-Year Prospective, Sequential Follow-Up Study of Heterogeneity in Associations of Duration of Untreated Psychosis With Symptoms, Functioning, and Quality of Life Following First-Episode Psychosis
Source: Atypon-hosted journal article supplement (doi:10.1176/appi.ajp.2021.20111658), 2022-04-01
Supplement: appi.ajp.2021.20111658.ds001.pdf [file appi.ajp.2021.20111658.ds001.pdf]

**Table S1: Participant dropout analyses (comparisons of baseline characteristics by follow-up group)**

| Follow-up group                                                                               | Sex  |       |        |       | Living alone status |       |    |        | Lifetime drug or alcohol abuse |       |    |       |
|-----------------------------------------------------------------------------------------------|------|-------|--------|-------|---------------------|-------|----|--------|--------------------------------|-------|----|-------|
|                                                                                               | Male |       | Female |       | Yes                 |       | No |        | Yes                            |       | No |       |
|                                                                                               | n    | %     | n      | %     | n                   | %     | n  | %      | n                              | %     | n  | %     |
| Group 1<br>(n = 25)<br>participated at baseline<br>and 6 months                               | 15   | 60.00 | 10     | 40.00 | 1                   | 4.00  | 24 | 96.00  | 10                             | 41.66 | 14 | 58.33 |
| Group 2<br>(n = 23)<br>participated at baseline,<br>6 months, and 4 years                     | 12   | 52.17 | 11     | 47.83 | 3                   | 13.04 | 20 | 86.96  | 12                             | 54.54 | 10 | 45.46 |
| Group 3 (n= 13)<br>participated at baseline,<br>6 months, 4 years, and<br>8 years             | 10   | 76.92 | 3      | 23.08 | 0                   | 0.00  | 13 | 100.00 | 4                              | 44.44 | 5  | 55.56 |
| Group 4 (n=20)<br>participated at baseline,<br>6 months, 4 years, 8<br>years, and<br>12 years | 13   | 65.00 | 7      | 35.00 | 0                   | 0.00  | 20 | 100.00 | 3                              | 21.43 | 11 | 78.57 |
| Group 5<br>(n = 34)<br>participated at baseline<br>and all subsequent<br>follow-ups           | 23   | 67.65 | 11     | 32.35 | 5                   | 15.15 | 28 | 84.85  | 16                             | 50.00 | 16 | 50.00 |
| Group 6<br>(n = 56)<br>participated in follow-<br>ups non sequentially                        | 26   | 46.43 | 30     | 53.57 | 7                   | 12.50 | 49 | 87.50  | 20                             | 38.46 | 32 | 57.14 |

|                                         |                      |                      |                      |
|-----------------------------------------|----------------------|----------------------|----------------------|
| <b>Chi square tests of independence</b> | $\chi^2 (5) = 7.046$ | $\chi^2 (5) = 6.545$ | $\chi^2 (5) = 4.955$ |
|                                         | p = 0.220            | p = 0.250            | p = 0.431            |
|                                         | n = 171              | n = 170              | n = 153              |

| Follow-up group                                                                               | Age |       |       | Years in education |       |      | Premorbid social adjustment |       |      | DUP |         |        |         |
|-----------------------------------------------------------------------------------------------|-----|-------|-------|--------------------|-------|------|-----------------------------|-------|------|-----|---------|--------|---------|
|                                                                                               | n   | Mean  | SD    | n                  | Mean  | SD   | n                           | Mean  | SD   | n   | Minimum | Median | Maximum |
| Group 1<br>(n = 25)<br>participated at baseline<br>and 6 months                               | 25  | 29.68 | 12.00 | 25                 | 12.92 | 3.20 | 16                          | 11.06 | 4.01 | 25  | 0.25    | 6      | 60      |
| Group 2<br>(n = 23)<br>participated at baseline,<br>6 months, and 4 years                     | 23  | 28.57 | 14.22 | 23                 | 12.52 | 2.47 | 15                          | 12.07 | 3.86 | 23  | 0.25    | 6      | 9       |
| Group 3 (n= 13)<br>participated at baseline,<br>6 months, 4 years, and<br>8 years             | 13  | 29.62 | 19.13 | 13                 | 13.15 | 2.64 | 9                           | 9.67  | 3.16 | 13  | 0.25    | 1.50   | 60      |
| Group 4 (n=20)<br>participated at baseline,<br>6 months, 4 years, 8<br>years, and<br>12 years | 20  | 29.35 | 13.15 | 20                 | 13.15 | 1.66 | 15                          | 12.33 | 5.18 | 19  | 0.25    | 5      | 240     |
| Group 5<br>(n = 34)<br>participated at baseline<br>and all subsequent<br>follow-ups           | 34  | 26.00 | 7.28  | 33                 | 13.12 | 3.10 | 30                          | 10.73 | 4.47 | 34  | 0.25    | 5.50   | 48      |
| Group 6<br>(n = 56)<br>participated in follow-<br>ups non sequentially                        | 56  | 30.84 | 10.99 | 56                 | 13.48 | 2.57 | 43                          | 11.05 | 4.06 | 56  | 0.25    | 3.50   | 120     |

|                                          |                   |                   |                   |           |
|------------------------------------------|-------------------|-------------------|-------------------|-----------|
| <b>F Ratio/<br/>Kruskal-Wallis tests</b> | F (5,165) = 0.708 | F (5,164) = 0.458 | F (5,122) = 0.663 | H = 3.703 |
|                                          | p = 0.618         | p = 0.807         | p = 0.652         | p = 0.593 |
|                                          | n = 171           | n = 170           | n = 128           | n = 170   |
|                                          |                   |                   |                   | df = 5    |

| Follow-up group                                                                               | SCID-I diagnosis        |       |                     |       |
|-----------------------------------------------------------------------------------------------|-------------------------|-------|---------------------|-------|
|                                                                                               | Non-affective psychosis |       | Affective psychosis |       |
|                                                                                               | n                       | %     | n                   | %     |
| Group 1<br>(n = 25)<br>participated at baseline<br>and 6 months                               | 23                      | 92.00 | 2                   | 8.00  |
| Group 2<br>(n = 23)<br>participated at<br>baseline, 6 months,<br>and 4 years                  | 22                      | 95.65 | 1                   | 4.35  |
| Group 3 (n= 13)<br>participated at<br>baseline, 6 months, 4<br>years, and 8 years             | 10                      | 76.92 | 3                   | 23.08 |
| Group 4 (n=20)<br>participated at<br>baseline, 6 months, 4<br>years, 8 years, and<br>12 years | 16                      | 80.00 | 4                   | 20.00 |
| Group 5<br>(n = 34)<br>participated at baseline<br>and all subsequent<br>follow-ups           | 23                      | 67.65 | 11                  | 32.35 |
| Group 6<br>(n = 56)<br>participated in follow-<br>ups non sequentially                        | 41                      | 73.21 | 15                  | 26.79 |

|                                         |                       |
|-----------------------------------------|-----------------------|
| <b>Chi square tests of independence</b> | $\chi^2 (5) = 10.189$ |
|                                         | p = 0.70              |
|                                         | n = 171               |

DUP = Duration of untreated psychosis in months

**Table S2: Reverse adjacent contrast analyses of time factor across PANSS, GAF, and QLS scores**

| Time point | PANSS Total |      |             |         | PANSS Positive |     |             |         | PANSS Negative |     |             |         |
|------------|-------------|------|-------------|---------|----------------|-----|-------------|---------|----------------|-----|-------------|---------|
|            | Mean        | SD   | $\chi^2(1)$ | p       | Mean           | SD  | $\chi^2(1)$ | p       | Mean           | SD  | $\chi^2(1)$ | p       |
| Baseline   | 73.1        | 19.6 |             |         | 21.1           | 6.5 |             |         | 15.0           | 7.3 |             |         |
| 6 months   | 53.3        | 16.1 | 102.91      | < 0.001 | 11.5           | 4.5 | 299.72      | < 0.001 | 13.4           | 6.2 | 15.92       | < 0.001 |
| 4 years    | 48.9        | 15.5 | 2.30        | 0.130   | 10.2           | 4.1 | 6.69        | 0.010   | 13.2           | 6.3 | 1.26        | 0.261   |
| 8 years    | 44.8        | 14.8 | 16.29       | < 0.001 | 9.8            | 4.5 | 1.92        | 0.165   | 12.1           | 5.7 | 5.19        | 0.023   |
| 12 years   | 47.4        | 14.7 | 6.58        | 0.010   | 11.0           | 4.4 | 13.20       | < 0.001 | 12.5           | 5.6 | 0.94        | 0.332   |
| 20 years   | 45.1        | 13.0 | 0.07        | 0.786   | 10.8           | 4.6 | 0.52        | 0.469   | 11.1           | 5.5 | 0.38        | 0.538   |

| Time point | PANSS General |     |             |         | GAF  |      |             |         | QLS  |      |             |         |
|------------|---------------|-----|-------------|---------|------|------|-------------|---------|------|------|-------------|---------|
|            | Mean          | SD  | $\chi^2(1)$ | p       | Mean | SD   | $\chi^2(1)$ | p       | Mean | SD   | $\chi^2(1)$ | p       |
| Baseline   | 37.0          | 9.9 |             |         | 23.0 | 8.4  |             |         | 55.5 | 20.7 |             |         |
| 6 months   | 28.4          | 8.4 | 76.98       | < 0.001 | 56.7 | 20.0 | 306.99      | < 0.001 | 80.5 | 25.3 | 38.32       | < 0.001 |
| 4 years    | 25.8          | 7.6 | 19.35       | < 0.001 | 62.3 | 17.5 | 9.75        | 0.002   | 88.3 | 25.9 | 8.93        | 0.003   |
| 8 years    | 23.0          | 6.9 | 19.66       | < 0.001 | 65.1 | 19.5 | 2.30        | 0.130   | 84.8 | 29.3 | 1.65        | 0.199   |
| 12 years   | 23.9          | 7.3 | 1.80        | 0.180   | 62.9 | 20.4 | 3.19        | 0.074   | 86.7 | 26.7 | 0.56        | 0.453   |
| 20 years   | 23.3          | 6.1 | 0.11        | 0.736   | 66.0 | 19.9 | 0.04        | 0.848   | 91.2 | 25.7 | 0.98        | 0.321   |

DUP = Duration of untreated psychosis in months; PANSS = Positive and Negative Syndrome Scale; GAF = Global Assessment of Functioning; QLS = Quality of Life Scale.

**Table S3: Reference category contrast analyses of DUP quartile factor across PANSS, GAF, and QLS scores  
(1<sup>st</sup> DUP quartile compared to 2<sup>nd</sup>, 3<sup>rd</sup>, and 4<sup>th</sup> quartile)**

| Quartile     | PANSS Total |      |             |         | PANSS Positive |     |             |         | PANSS Negative |     |             |       |
|--------------|-------------|------|-------------|---------|----------------|-----|-------------|---------|----------------|-----|-------------|-------|
|              | Mean        | SD   | $\chi^2(1)$ | p       | Mean           | SD  | $\chi^2(1)$ | p       | Mean           | SD  | $\chi^2(1)$ | p     |
| 1st quartile | 48.5        | 18.5 |             |         | 12.1           | 6.5 |             |         | 11.2           | 5.3 |             |       |
| 2nd quartile | 52.0        | 19.4 | 0.29        | 0.592   | 12.5           | 7.1 | 0.90        | 0.343   | 13.0           | 6.5 | 1.24        | 0.265 |
| 3rd quartile | 60.4        | 19.1 | 8.74        | 0.003   | 13.6           | 6.5 | 3.47        | 0.062   | 13.4           | 6.5 | 5.29        | 0.022 |
| 4th quartile | 59.6        | 19.2 | 18.18       | < 0.001 | 14.4           | 6.4 | 15.14       | < 0.001 | 15.7           | 6.4 | 10.30       | 0.001 |

| Quartile     | PANSS General |     |             |         | GAF  |      |             |         | QLS  |      |             |         |
|--------------|---------------|-----|-------------|---------|------|------|-------------|---------|------|------|-------------|---------|
|              | Mean          | SD  | $\chi^2(1)$ | p       | Mean | SD   | $\chi^2(1)$ | p       | Mean | SD   | $\chi^2(1)$ | p       |
| 1st quartile | 25.4          | 9.4 |             |         | 59.4 | 26.1 |             |         | 95.3 | 25.1 |             |         |
| 2nd quartile | 26.6          | 9.3 | 0.30        | 0.584   | 55.9 | 24.0 | 1.33        | 0.250   | 84.8 | 27.0 | 4.51        | 0.034   |
| 3rd quartile | 29.4          | 9.6 | 9.82        | 0.002   | 49.5 | 22.5 | 5.08        | 0.024   | 82.1 | 25.3 | 7.30        | 0.007   |
| 4th quartile | 30.5          | 9.4 | 15.82       | < 0.001 | 46.7 | 21.3 | 23.59       | < 0.001 | 65.7 | 26.2 | 26.19       | < 0.001 |

DUP = Duration of untreated psychosis in months; PANSS = Positive and Negative Syndrome Scale; GAF = Global Assessment of Functioning; QLS = Quality of Life Scale.
